# Supplementary material for: Optimization of Modified Atmosphere Packaging for Sheep’s Milk Semi-Hard Cheese Wedges during Refrigerated Storage: Physicochemical and Sensory Properties
Source: MDPI journal article supplement (doi:10.3390/foods12040849), 2023-02-16
Supplement: s1 [file s1]

Table S1. Mean, standard deviation and significance level of Kruskal-Wallis H for Texture Analysis Profile of packaged cheese wedges stored for eight weeks at different atmosphere treatments.

| Treatment | Days | Hardness (N)                | Slope (N/s)                 | Springiness                | Chewiness (N)               | Resilience                 | Cohesiveness              |
|-----------|------|-----------------------------|-----------------------------|----------------------------|-----------------------------|----------------------------|---------------------------|
| Air       | 0    | 0.313±0.054 <sup>3</sup>    | 0.141±0.026 <sup>3</sup>    | 0.890±0.020 <sup>1</sup>   | 0.211±0.036 <sup>3</sup>    | 0.420±0.010 <sup>2</sup>   | 0.760±0.010 <sup>1</sup>  |
|           | 14   | 0.365±0.046 <sup>a12</sup>  | 0.162±0.024 <sup>a12</sup>  | 0.890±0.030 <sup>a1</sup>  | 0.245±0.035 <sup>a2</sup>   | 0.420±0.010 <sup>a2</sup>  | 0.750±0.020 <sup>a1</sup> |
|           | 21   | 0.399±0.064 <sup>a1</sup>   | 0.176±0.028 <sup>a1</sup>   | 0.890±0.030 <sup>ab1</sup> | 0.270±0.048 <sup>a1</sup>   | 0.440±0.010 <sup>ab1</sup> | 0.760±0.010 <sup>a1</sup> |
|           | 28   | 0.355±0.033 <sup>a12</sup>  | 0.156±0.015 <sup>a123</sup> | 0.880±0.030 <sup>a1</sup>  | 0.236±0.023 <sup>a2</sup>   | 0.420±0.010 <sup>a2</sup>  | 0.750±0.020 <sup>a1</sup> |
|           | 35   | 0.374±0.042 <sup>ab12</sup> | 0.163±0.020 <sup>ab2</sup>  | 0.850±0.170 <sup>b1</sup>  | 0.224±0.072 <sup>a2</sup>   | 0.430±0.020 <sup>a12</sup> | 0.760±0.020 <sup>a1</sup> |
|           | 42   | 0.360±0.036 <sup>ab12</sup> | 0.158±0.019 <sup>ab2</sup>  | 0.890±0.020 <sup>a1</sup>  | 0.237±0.065 <sup>ab12</sup> | 0.430±0.010 <sup>a12</sup> | 0.760±0.020 <sup>a1</sup> |
|           | 49   | 0.333±0.049 <sup>a23</sup>  | 0.144±0.024 <sup>ab23</sup> | 0.790±0.290 <sup>a1</sup>  | 0.202±0.094 <sup>a23</sup>  | 0.430±0.020 <sup>a12</sup> | 0.700±0.190 <sup>a1</sup> |
| Vacuum    | 56   | 0.341±0.052 <sup>a23</sup>  | 0.151±0.025 <sup>a23</sup>  | 0.810±0.260 <sup>a1</sup>  | 0.186±0.079 <sup>ab3</sup>  | 0.420±0.010 <sup>a2</sup>  | 0.750±0.010 <sup>a1</sup> |
|           | 14   | 0.366±0.037 <sup>a1</sup>   | 0.162±0.022 <sup>a1</sup>   | 0.860±0.140 <sup>a1</sup>  | 0.242±0.025 <sup>a1</sup>   | 0.430±0.020 <sup>a12</sup> | 0.760±0.020 <sup>a1</sup> |
|           | 21   | 0.355±0.055 <sup>a1</sup>   | 0.156±0.024 <sup>a1</sup>   | 0.900±0.040 <sup>a1</sup>  | 0.245±0.043 <sup>a1</sup>   | 0.440±0.020 <sup>a1</sup>  | 0.760±0.010 <sup>a1</sup> |
|           | 28   | 0.336±0.029 <sup>ab12</sup> | 0.146±0.015 <sup>ab</sup>   | 0.890±0.030 <sup>a1</sup>  | 0.226±0.021 <sup>ab12</sup> | 0.420±0.010 <sup>a2</sup>  | 0.760±0.020 <sup>a1</sup> |
|           | 35   | 0.386±0.064 <sup>a1</sup>   | 0.169±0.028 <sup>a1</sup>   | 0.840±0.220 <sup>b1</sup>  | 0.251±0.044 <sup>a1</sup>   | 0.430±0.010 <sup>a12</sup> | 0.760±0.010 <sup>a1</sup> |
|           | 42   | 0.365±0.043 <sup>ab1</sup>  | 0.165±0.023 <sup>a1</sup>   | 0.770±0.320 <sup>a1</sup>  | 0.205±0.060 <sup>b2</sup>   | 0.420±0.010 <sup>a12</sup> | 0.750±0.020 <sup>a1</sup> |
|           | 49   | 0.339±0.036 <sup>a12</sup>  | 0.151±0.018 <sup>a23</sup>  | 0.870±0.160 <sup>a1</sup>  | 0.192±0.069 <sup>ab2</sup>  | 0.430±0.020 <sup>a12</sup> | 0.740±0.140 <sup>a1</sup> |
| MAP1      | 56   | 0.316±0.049 <sup>a2</sup>   | 0.141±0.022 <sup>a2</sup>   | 0.880±0.160 <sup>a1</sup>  | 0.181±0.044 <sup>b2</sup>   | 0.420±0.020 <sup>a2</sup>  | 0.750±0.020 <sup>a1</sup> |
|           | 14   | 0.357±0.040 <sup>a12</sup>  | 0.157±0.022 <sup>a12</sup>  | 0.880±0.020 <sup>a1</sup>  | 0.233±0.053 <sup>ab12</sup> | 0.430±0.010 <sup>a12</sup> | 0.760±0.010 <sup>a1</sup> |
|           | 21   | 0.382±0.038 <sup>a1</sup>   | 0.166±0.019 <sup>a1</sup>   | 0.880±0.030 <sup>ab1</sup> | 0.253±0.048 <sup>a1</sup>   | 0.430±0.020 <sup>ab1</sup> | 0.750±0.120 <sup>a1</sup> |
|           | 28   | 0.359±0.027 <sup>a12</sup>  | 0.154±0.013 <sup>a12</sup>  | 0.890±0.020 <sup>a1</sup>  | 0.241±0.020 <sup>a1</sup>   | 0.420±0.010 <sup>a12</sup> | 0.760±0.020 <sup>a1</sup> |
|           | 35   | 0.345±0.043 <sup>ab2</sup>  | 0.151±0.021 <sup>ab23</sup> | 0.880±0.160 <sup>ab1</sup> | 0.225±0.087 <sup>a12</sup>  | 0.420±0.020 <sup>a12</sup> | 0.750±0.020 <sup>a1</sup> |
|           | 42   | 0.369±0.056 <sup>a12</sup>  | 0.162±0.029 <sup>a12</sup>  | 0.810±0.260 <sup>a1</sup>  | 0.228±0.090 <sup>a1</sup>   | 0.420±0.020 <sup>a12</sup> | 0.700±0.180 <sup>a1</sup> |
|           | 49   | 0.339±0.055 <sup>a2</sup>   | 0.152±0.024 <sup>a23</sup>  | 0.810±0.270 <sup>a1</sup>  | 0.186±0.085 <sup>ab3</sup>  | 0.430±0.020 <sup>a1</sup>  | 0.740±0.120 <sup>a1</sup> |
| MAP2      | 56   | 0.330±0.061 <sup>a2</sup>   | 0.148±0.030 <sup>a23</sup>  | 0.810±0.270 <sup>a1</sup>  | 0.196±0.057 <sup>ab23</sup> | 0.420±0.010 <sup>a2</sup>  | 0.750±0.020 <sup>a1</sup> |
|           | 14   | 0.314±0.041 <sup>bc2</sup>  | 0.137±0.018 <sup>b2</sup>   | 0.880±0.040 <sup>a2</sup>  | 0.205±0.050 <sup>b12</sup>  | 0.430±0.020 <sup>a12</sup> | 0.740±0.150 <sup>a1</sup> |
|           | 21   | 0.368±0.042 <sup>a1</sup>   | 0.158±0.020 <sup>a1</sup>   | 0.890±0.020 <sup>ab1</sup> | 0.246±0.037 <sup>a1</sup>   | 0.420±0.030 <sup>b12</sup> | 0.760±0.030 <sup>a1</sup> |
|           | 28   | 0.329±0.032 <sup>b23</sup>  | 0.144±0.016 <sup>b12</sup>  | 0.880±0.020 <sup>a2</sup>  | 0.220±0.023 <sup>b2</sup>   | 0.430±0.010 <sup>a12</sup> | 0.760±0.010 <sup>a1</sup> |
|           | 35   | 0.343±0.049 <sup>ab12</sup> | 0.150±0.021 <sup>ab12</sup> | 0.920±0.040 <sup>a12</sup> | 0.236±0.053 <sup>a1</sup>   | 0.430±0.020 <sup>a12</sup> | 0.710±0.190 <sup>a1</sup> |
|           | 42   | 0.369±0.050 <sup>ab12</sup> | 0.164±0.025 <sup>a1</sup>   | 0.870±0.140 <sup>a12</sup> | 0.208±0.068 <sup>c2</sup>   | 0.430±0.020 <sup>a12</sup> | 0.730±0.130 <sup>a1</sup> |
|           | 49   | 0.326±0.051 <sup>ab23</sup> | 0.144±0.020 <sup>ab12</sup> | 0.870±0.170 <sup>a12</sup> | 0.176±0.076 <sup>b2</sup>   | 0.440±0.010 <sup>a1</sup>  | 0.710±0.200 <sup>a1</sup> |
| MAP3      | 56   | 0.298±0.050 <sup>ab3</sup>  | 0.133±0.024 <sup>ab2</sup>  | 0.870±0.180 <sup>a2</sup>  | 0.163±0.067 <sup>b2</sup>   | 0.420±0.020 <sup>a2</sup>  | 0.750±0.020 <sup>a1</sup> |
|           | 14   | 0.351±0.070 <sup>ab23</sup> | 0.153±0.029 <sup>ab12</sup> | 0.880±0.020 <sup>a</sup>   | 0.237±0.049 <sup>ab12</sup> | 0.430±0.010 <sup>a1</sup>  | 0.760±0.010 <sup>a1</sup> |
|           | 21   | 0.386±0.055 <sup>a1</sup>   | 0.167±0.026 <sup>a1</sup>   | 0.890±0.030 <sup>ab</sup>  | 0.256±0.040 <sup>a1</sup>   | 0.430±0.020 <sup>b12</sup> | 0.760±0.020 <sup>a1</sup> |
|           | 28   | 0.322±0.036 <sup>b23</sup>  | 0.141±0.019 <sup>b2</sup>   | 0.860±0.160 <sup>a</sup>   | 0.204±0.058 <sup>b2</sup>   | 0.430±0.020 <sup>a12</sup> | 0.730±0.140 <sup>a1</sup> |
|           | 35   | 0.349±0.041 <sup>ab12</sup> | 0.150±0.019 <sup>ab12</sup> | 0.870±0.160 <sup>ab</sup>  | 0.222±0.023 <sup>a12</sup>  | 0.420±0.020 <sup>a12</sup> | 0.750±0.020 <sup>a1</sup> |
|           | 42   | 0.326±0.051 <sup>ab23</sup> | 0.141±0.025 <sup>ab12</sup> | 0.790±0.280 <sup>a</sup>   | 0.214±0.106 <sup>bc12</sup> | 0.420±0.020 <sup>a12</sup> | 0.690±0.210 <sup>a1</sup> |
|           | 49   | 0.307±0.049 <sup>b3</sup>   | 0.135±0.024 <sup>b23</sup>  | 0.790±0.310 <sup>a</sup>   | 0.227±0.089 <sup>ab12</sup> | 0.430±0.020 <sup>a1</sup>  | 0.680±0.220 <sup>a1</sup> |
| MAP4      | 56   | 0.261±0.042 <sup>b3</sup>   | 0.119±0.021 <sup>b3</sup>   | 0.860±0.180 <sup>a</sup>   | 0.217±0.060 <sup>a12</sup>  | 0.420±0.020 <sup>a2</sup>  | 0.750±0.020 <sup>a1</sup> |
|           | 14   | 0.317±0.057 <sup>c12</sup>  | 0.138±0.026 <sup>ab12</sup> | 0.860±0.150 <sup>a</sup>   | 0.212±0.053 <sup>b2</sup>   | 0.430±0.020 <sup>a1</sup>  | 0.770±0.020 <sup>a1</sup> |
|           | 21   | 0.384±0.064 <sup>a1</sup>   | 0.167±0.028 <sup>a1</sup>   | 0.850±0.140 <sup>b</sup>   | 0.248±0.076 <sup>a1</sup>   | 0.430±0.020 <sup>b1</sup>  | 0.740±0.130 <sup>a1</sup> |
|           | 28   | 0.341±0.029 <sup>b1</sup>   | 0.146±0.015 <sup>b2</sup>   | 0.840±0.210 <sup>a</sup>   | 0.212±0.071 <sup>b12</sup>  | 0.420±0.010 <sup>a12</sup> | 0.730±0.140 <sup>a1</sup> |
|           | 35   | 0.337±0.053 <sup>bc12</sup> | 0.145±0.025 <sup>ab12</sup> | 0.870±0.160 <sup>ab</sup>  | 0.227±0.069 <sup>a12</sup>  | 0.430±0.020 <sup>a1</sup>  | 0.760±0.020 <sup>a1</sup> |
|           | 42   | 0.330±0.050 <sup>bc12</sup> | 0.146±0.024 <sup>ab12</sup> | 0.850±0.190 <sup>a</sup>   | 0.202±0.077 <sup>bc12</sup> | 0.420±0.020 <sup>a12</sup> | 0.700±0.190 <sup>a1</sup> |
|           | 49   | 0.305±0.064 <sup>ab23</sup> | 0.138±0.029 <sup>b23</sup>  | 0.830±0.260 <sup>a</sup>   | 0.194±0.067 <sup>ab2</sup>  | 0.430±0.020 <sup>a12</sup> | 0.750±0.020 <sup>a1</sup> |
|           | 56   | 0.258±0.035 <sup>b3</sup>   | 0.113±0.018 <sup>b3</sup>   | 0.850±0.190 <sup>a</sup>   | 0.218±0.032 <sup>a12</sup>  | 0.420±0.020 <sup>a12</sup> | 0.750±0.020 <sup>a1</sup> |

MAP1: 20/80% CO<sub>2</sub>/N<sub>2</sub> (v/v); MAP2: 50/50% CO<sub>2</sub>/N<sub>2</sub> (v/v); MAP3: 80/20% CO<sub>2</sub>/N<sub>2</sub> (v/v); MAP4: 100/0% CO<sub>2</sub>/N<sub>2</sub> (v/v)

Different letters (a-c) in the same column indicate significant differences ( $p \leq 0.05$ ) between the different packaging conditions on that day

Different numbers (1-3) in the same column indicate significant differences ( $p \leq 0.05$ ) during storage time for each packaging condition
