# Supplementary material for: Optimization of Modified Atmosphere Packaging for Sheep’s Milk Semi-Hard Cheese Wedges during Refrigerated Storage: Physicochemical and Sensory Properties
Source: MDPI journal article supplement (doi:10.3390/foods12040849), 2023-02-16
Supplement: s1 [file s1]

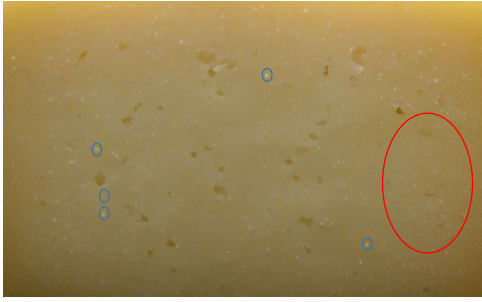

Figure S1. Photograph of cheese paste with examples of white spot area in red and small crystals in blue.
